# Supplementary material for: Normative Values of Retinal Nerve Fibre Layer Thickness and Optic Nerve Head Parameters and Their Association with Visual Function in an African Population
Source: Hindawi journal article supplement (doi:10.1155/2020/7150673), 2020-02-11
Supplement: f1 [file 7150673.f1.pdf]

## SUPPLEMENTARY TABLES

**Table 1 GLM Univariate analysis of variance for Factors significant for RNFL thickness**

| Tests of Between-Subjects Effects |                                                 |          |       |                                                 |       |       |                                                 |         |       |                                                 |         |       |                                                 |          |       |
|-----------------------------------|-------------------------------------------------|----------|-------|-------------------------------------------------|-------|-------|-------------------------------------------------|---------|-------|-------------------------------------------------|---------|-------|-------------------------------------------------|----------|-------|
| Dependent Variable:               | AVG RNFL                                        |          |       | SUP RNFL                                        |       |       | NSL RNFL                                        |         |       | INF RNFL                                        |         |       | TEMP RNFL                                       |          |       |
| Source                            | Type III Sum of Squares                         | F        | Sig.  | Type III Sum of Squares                         | F     | Sig.  | Type III Sum of Squares                         | F       | Sig.  | Type III Sum of Squares                         | F       | Sig.  | Type III Sum of Squares                         | F        | Sig.  |
| Corrected Model                   | 2265.598 <sup>a</sup>                           | 2.457    | 0.002 | 6708.984 <sup>a</sup>                           | 1.572 | 0.076 | 2147.254 <sup>a</sup>                           | 3.173   | 0.011 | 5532.238 <sup>a</sup>                           | 1.441   | 0.123 | 2595.331 <sup>a</sup>                           | 1.438    | 0.124 |
| Intercept                         | 542857.02                                       | 12950.35 | 0     | 903182.45                                       | 4655  | 0     | 423167.71                                       | 3126.09 | 0     | 909793.35                                       | 5212.45 | 0     | 234369.83                                       | 2856.911 | 0     |
| Age                               | 460.16                                          | 5.49     | 0.006 | 112.17                                          | 0.29  | 0.75  | 1428.24                                         | 5.28    | 0.007 | 537.29                                          | 1.54    | 0.221 | 354.731                                         | 2.162    | 0.122 |
| Refractive error                  | 202.69                                          | 1.21     | 0.314 | 1497.87                                         | 1.93  | 0.114 |                                                 |         |       | 455.16                                          | 0.65    | 0.627 | 773.459                                         | 2.357    | 0.061 |
| Gender                            | 251.73                                          | 6.01     | 0.017 | 1053.12                                         | 5.43  | 0.022 | 312.66                                          | 2.31    | 0.132 | 51.98                                           | 0.3     | 0.587 | 499.463                                         | 6.088    | 0.016 |
| Age * Refractive error            | 249.64                                          | 0.99     | 0.436 | 1073.05                                         | 0.92  | 0.484 |                                                 |         |       | 488.15                                          | 0.47    | 0.831 | 661.634                                         | 1.344    | 0.248 |
| Age * Gender                      | 15.03                                           | 0.18     | 0.836 | 384.75                                          | 0.99  | 0.376 | 128.83                                          | 0.48    | 0.623 | 99.45                                           | 0.28    | 0.753 | 177.786                                         | 1.084    | 0.343 |
| Refractive error * Gender         | 28.19                                           | 0.17     | 0.954 | 525.6                                           | 0.68  | 0.61  |                                                 |         |       | 693.13                                          | 0.99    | 0.417 | 305.31                                          | 0.93     | 0.451 |
| Age * Refractive error * Gender   | 18.95                                           | 0.15     | 0.929 | 601.66                                          | 1.03  | 0.383 |                                                 |         |       | 452.89                                          | 0.86    | 0.463 | 560.144                                         | 2.276    | 0.086 |
| Error                             | 3227.71                                         |          |       | 14939.86                                        |       |       | 12724.46                                        |         |       | 13439.76                                        |         |       | 6316.779                                        |          |       |
| Total                             | 1053455                                         |          |       | 1751926                                         |       |       | 603621                                          |         |       | 1803868                                         |         |       | 455537                                          |          |       |
| Corrected Total                   | 5493.31                                         |          |       | 21648.84                                        |       |       | 14871.71                                        |         |       | 18972                                           |         |       | 8912.11                                         |          |       |
|                                   | a. R Squared = .412 (Adjusted R Squared = .245) |          |       | a. R Squared = .310 (Adjusted R Squared = .113) |       |       | a. R Squared = .144 (Adjusted R Squared = .099) |         |       | a. R Squared = .292 (Adjusted R Squared = .089) |         |       | a. R Squared = .291 (Adjusted R Squared = .089) |          |       |

Abbreviations: RNFL, retinal nerve fibre layer; RE, spherical equivalent refractive error; AVG, average; SUP, superior; NSL, nasal; TEMP, temporal; INF, inferior; VERT CDR, vertical cup-disc ratio; AVG CDR, average cup-disc ratio; CUP VOLM, cup volume

**Table 2 Parameter estimates for RNFL parameter**

| Dependent Variable:   | AVG RNFL       |       |       |              | SUP RNFL       |       |       |               | NSL RNFL       |      |       |             | INF RNFL       |       |       |               | TEMP INFL      |        |      |                |        |
|-----------------------|----------------|-------|-------|--------------|----------------|-------|-------|---------------|----------------|------|-------|-------------|----------------|-------|-------|---------------|----------------|--------|------|----------------|--------|
|                       | Parameter      | B     | t     | Sig.         | 95% CI         | B     | t     | Sig.          | 95% CI         | B    | t     | Sig.        | 95% CI         | B     | t     | Sig.          | 95% CI         | B      | t    | Sig.           | 95% CI |
| <b>Intercept</b>      | 94             | 32.46 | 0     | 88.23-99.77  | 118            | 18.94 | 0     | 105.60-130.40 | 67.11          | 17.3 | 0     | 59.41-74.81 | 119.4          | 20.21 | 0     | 107.63-131.17 | 71.200         | 17.578 | .000 | 63.134-79.266  |        |
| <b>19 - 39</b>        | 4.42           | 0.44  | 0.662 | -15.63-24.46 | 15.47          | 0.71  | 0.477 | -27.65-58.59  | 12.24          | 2.62 | 0.01  | 2.97-21.51  | -20.45         | -1    | 0.323 | -81.8         | 11.300         | .803   | .425 | -16.737-39.337 |        |
| <b>40 - 59</b>        | 2.67           | 0.56  | 0.574 | -6.75-12.08  | -4.67          | -0.46 | 0.648 | -24.92-15.59  | 5.14           | 1.1  | 0.274 | -4.13-14.41 | 0.93           | 0.1   | 0.923 | -38.43        | -4.200         | -.635  | .527 | -17.371-8.971  |        |
| <b>60 +</b>           | 0 <sup>a</sup> |       |       |              | 0 <sup>a</sup> |       |       |               | 0 <sup>a</sup> |      |       |             | 0 <sup>a</sup> |       |       |               | 0 <sup>a</sup> |        |      |                |        |
| <b>Plano</b>          | 0              | 0     | 1     | -10.53-10.53 | 0.67           | 0.06  | 0.953 | -21.98-23.31  | -              | -    | -     | -           | 15.33          | 1.42  | 0.159 | -42.96        | -6.000         | -.811  | .420 | -20.726-8.726  |        |
| <b>Low Hyperopia</b>  | -4             | -0.56 | 0.574 | -18.12-10.12 | -2             | -0.13 | 0.896 | -32.38-28.38  | -              | -    | -     | -           | -7.4           | -0.51 | 0.611 | -57.64        | -18.200        | -1.834 | .070 | -37.957-1.557  |        |
| <b>High Hyperopia</b> | -9             | -1.66 | 0.101 | -19.79-1.79  | -8.5           | -0.73 | 0.468 | -31.71-14.71  | -              | -    | -     | -           | -5.9           | -0.53 | 0.595 | -44.02        | -17.200        | -2.270 | .026 | -32.290--2.110 |        |
| <b>Low Myopia</b>     | 5              | 0.7   | 0.483 | -9.12-19.12  | 15             | 0.98  | 0.329 | -15.38-45.38  | -              | -    | -     | -           | 15.6           | 1.08  | 0.284 | -57.64        | -14.200        | -1.431 | .156 | -33.957-5.557  |        |
| <b>High Myopia</b>    | 0 <sup>a</sup> |       |       |              | 0 <sup>a</sup> |       |       | -27.65-58.59  | -              |      |       |             | 0 <sup>a</sup> |       |       |               | 0 <sup>a</sup> |        |      |                |        |
| <b>Female</b>         | 5.5            | 1.02  | 0.313 | -5.29-16.29  | 10.5           | 0.9   | 0.37  | -24.92-15.59  | 4.06           | 0.66 | 0.51  | -8.12-16.23 | 10.6           | 0.96  | 0.341 | -44.02        | -1.700         | -.224  | .823 | -16.790-13.390 |        |
| <b>Male</b>           | 0 <sup>a</sup> |       |       |              | 0 <sup>a</sup> |       |       |               | 0 <sup>a</sup> |      |       |             | 0 <sup>a</sup> |       |       |               | 0 <sup>a</sup> |        |      |                |        |

Abbreviations: RNFL, retinal nerve fibre layer; RE, spherical equivalent refractive error; AVG, average; SUP, superior; NSL, nasal; TEMP, temporal; INF, inferior;  
 VERT CDR, vertical cup-disc ratio; AVG CDR, average cup-disc ratio; CUP VOLM, cup volume

**Table 3 Binary Logistic Regression: Glaucoma and Normals Adjusted for age**

|           | B       | S.E.   | Wald   | df | Sig. | Exp(B)   | 95% C.I.for EXP(B) |          |
|-----------|---------|--------|--------|----|------|----------|--------------------|----------|
|           |         |        |        |    |      |          | Lower              | Upper    |
| AGE       | .177    | .053   | 11.356 | 1  | .001 | 1.19     | 1.08               | 1.32     |
| AVG_RNFL  | .412    | .220   | 3.491  | 1  | .062 | 1.51     | 0.98               | 2.32     |
| SUP_RNFL  | -.099   | .060   | 2.766  | 1  | .096 | 0.91     | 0.81               | 1.02     |
| NSL_RNFL  | -.161   | .062   | 6.660  | 1  | .010 | 0.85     | 0.75               | 0.96     |
| TEMP_RNFL | -.118   | .075   | 2.490  | 1  | .115 | 0.89     | 0.77               | 1.03     |
| INF_RNFL  | -.122   | .067   | 3.376  | 1  | .066 | 0.88     | 0.78               | 1.01     |
| RIM_AREA  | 9.061   | 3.239  | 7.826  | 1  | .005 | 8610.65  | 15.07              | 4.92E+6  |
| DISC_AREA | -4.056  | 1.796  | 5.101  | 1  | .024 | 0.02     | 5.13E-4            | 0.59     |
| VERT_CDR  | 54.764  | 19.578 | 7.825  | 1  | .005 | 6.08E+23 | 1.312E+7           | 2.81E+40 |
| AVG_CDR   | 49.447  | 14.932 | 10.965 | 1  | .001 | 2.98E+21 | 5.801E+8           | 15.3E+34 |
| CUP_VOLM  | -2.513  | 3.777  | .443   | 1  | .506 | 0.08     | 4.94E-4            | 132.77   |
| Constant  | -66.998 | 18.586 | 12.995 | 1  | .000 | 0.00     |                    |          |

Abbreviations: RNFL, retinal nerve fibre layer; RE, spherical equivalent refractive error; AVG, average; SUP, superior; NSL, nasal; TEMP, temporal; INF, inferior; VERT CDR, vertical cup-disc ratio; AVG CDR, average cup-disc ratio; CUP VOLM, cup volume
